# Supplementary material for: An erythrocyte membrane-camouflaged biomimetic nanoplatform for enhanced chemo-photothermal therapy of breast cancer
Source: Royal Society of Chemistry journal article supplement (doi:10.1039/d1tb02522h), 2022-01-01
Supplement: d1tb02522h1.pdf [file d1tb02522h1.pdf]

**An erythrocyte membrane-camouflaged biomimetic nanoplatform  
for enhanced chemo-photothermal therapy of breast cancer**

Jia-Qian Li, Rui-Xin Zhao, Feng-Mei Yang, Xia-Ting Qi, Peng-Kun Ye,

Meng Xie\*

School of Pharmacy, Jiangsu University, 212013, China

Corresponding author E-mail addresses: [xiemeng@ujs.edu.cn](mailto:xiemeng@ujs.edu.cn)

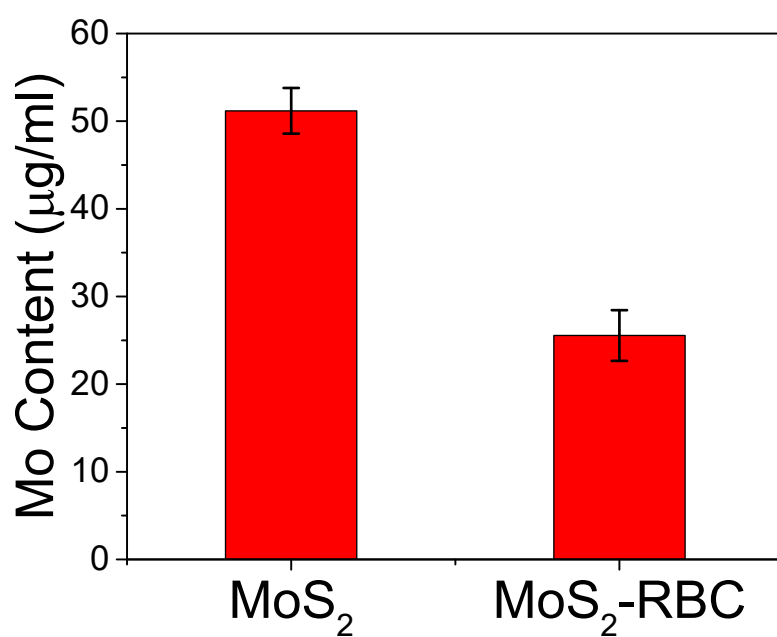

Fig. S1 The content of Mo element in RAW 264.7 cells was determined by ICP-OES.

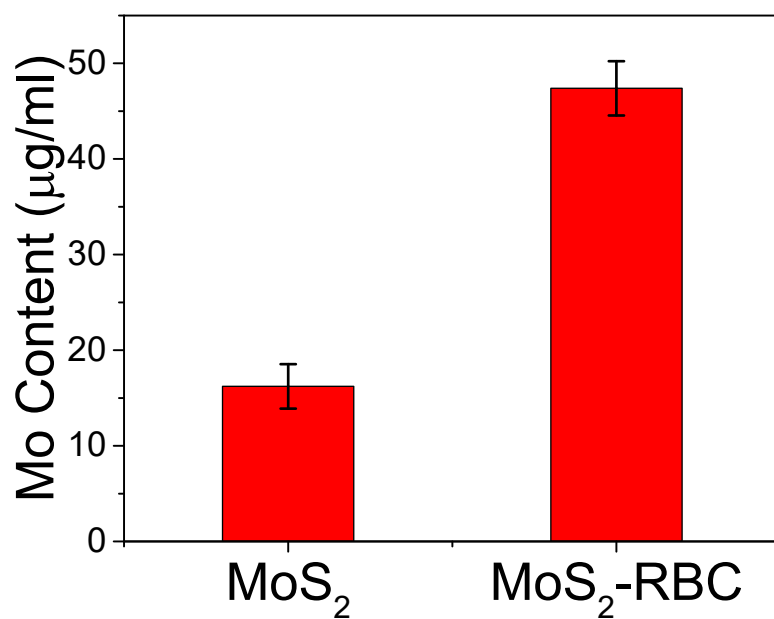

Fig. S2 The content of Mo element in MCF-7 cells was determined by ICP-OES.
